# Supplementary material for: Monitoring the chemical and electronic properties of electrolyte–electrode interfaces in all-solid-state batteries usingoperandoX-ray photoelectron spectroscopy
Source: Royal Society of Chemistry journal article supplement (doi:10.1039/c8cp01213j), 2018-01-01
Supplement: c8cp01213j1.pdf [file c8cp01213j1.pdf]

## Supporting Information

### Monitoring the Chemical and Electronic Properties of Electrolyte–Electrode Interfaces in All-Solid-State Batteries Using *Operando* X-ray Photoelectron Spectroscopy

*Xiaohan Wu, Claire Villevieille, Petr Novák, Mario El Kazzi\**

Paul Scherrer Institute, Electrochemistry Laboratory, CH-5232 Villigen, PSI, Switzerland

#### AUTHOR INFORMATION

##### Corresponding Author

\*Mario El Kazzi [mario.el-kazzi@psi.ch](mailto:mario.el-kazzi@psi.ch)

**Operando XPS measurement on the WE LCO/LPS/VGCF (45/50/5, w/w/w)**

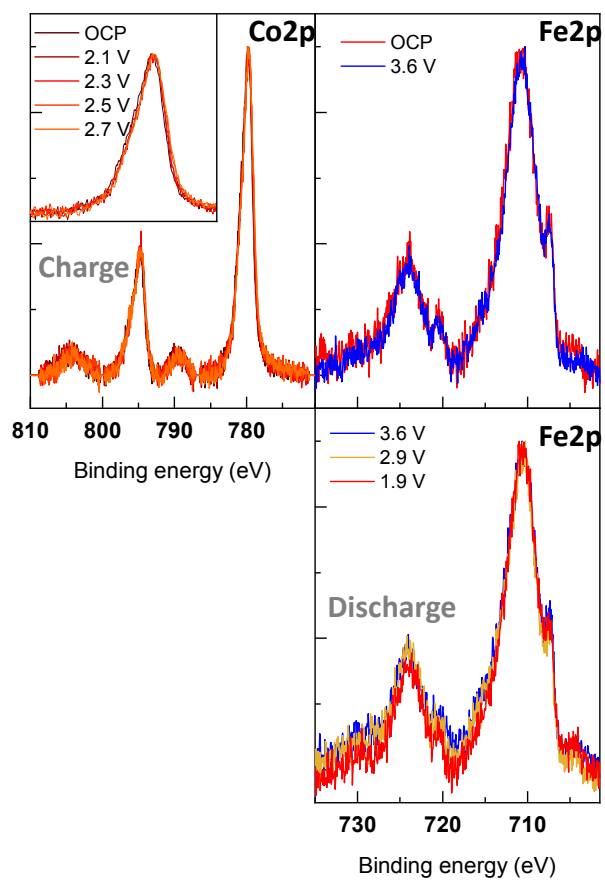

**Figure S1.** Co<sub>2</sub>p and Fe<sub>2</sub>p core levels spectra at selected potential recorded during the *operando* XPS measurement of the WE (45 wt% LCO, 50 wt% LPS and 5 wt% VGCF) cycled vs. InLi<sub>x</sub>.

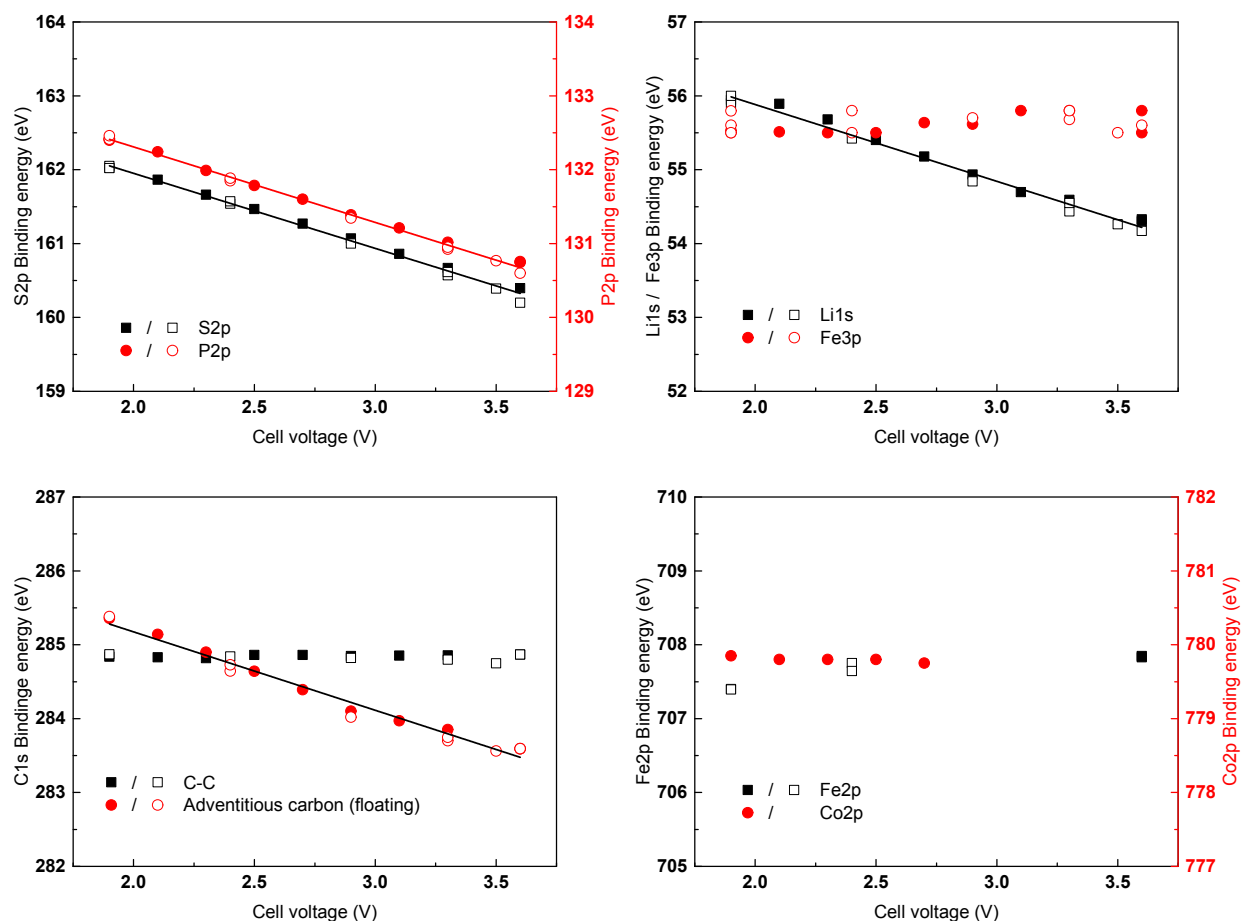

| Core level        | Slope (eV/V)     | Adj. R-Square |
|-------------------|------------------|---------------|
| S2p               | $-1.02 \pm 0.02$ | 0.9950        |
| P2p               | $-1.02 \pm 0.01$ | 0.9961        |
| Li1s              | $-1.04 \pm 0.02$ | 0.9894        |
| C1s (C-H, float.) | $-1.06 \pm 0.04$ | 0.9775        |

| Core level | Binding energy (eV) |
|------------|---------------------|
| Fe3p       | $55.6 \pm 0.1$      |
| Fe2p       | $710.5 \pm 0.1$     |
| Co2p       | $779.8 \pm 0.0$     |
| C1s (C-C)  | $284.9 \pm 0.1$     |

**Figure S2.** WE electrode grounded to the analyzer. Apparent binding energy shifts of the main peak in the S2p, P2p, C1s, Fe3p/Fe2p and Co2p spectra as a function of the cell voltage. Solid symbols data were recorded during the delithiation and open symbols data were recorded during lithiation of the WE (45 wt% LCO, 50 wt% LPS and 5 wt% VGCF) cycled vs.  $\text{InLi}_x$ .

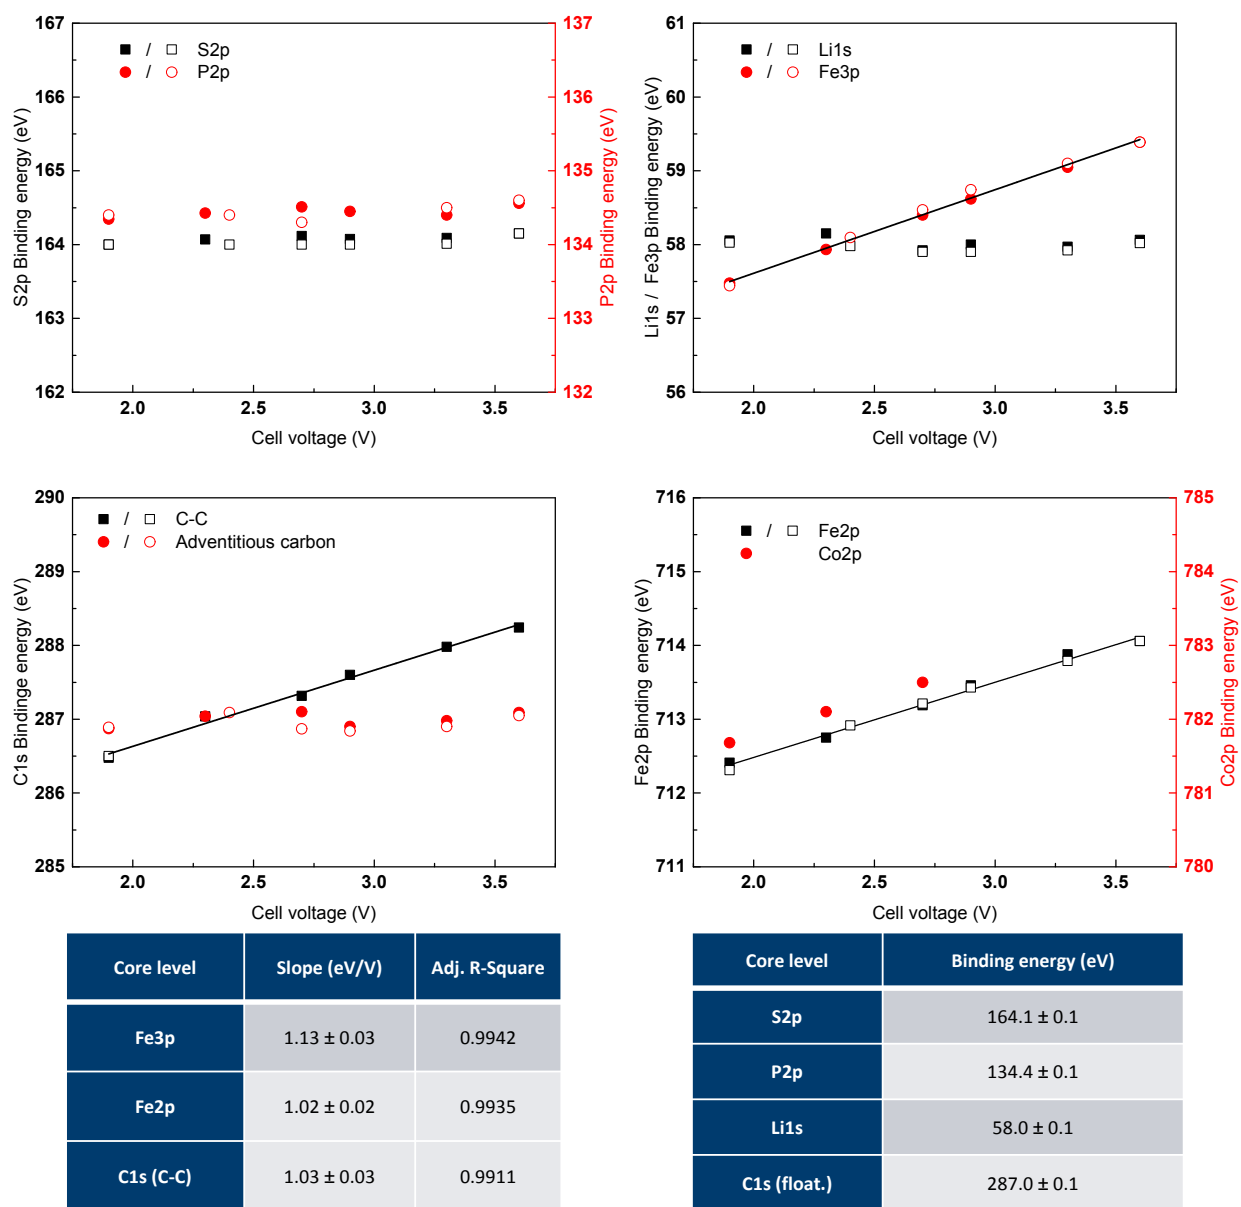

**Figure S3.** CE electrode grounded to the analyzer. Apparent binding energy shifts of the main peak in the S2p, P2p, C1s, Fe3p/Fe2p and Co2p spectra as a function of the cell voltage. Solid symbols data were recorded during the delithiation and open symbols data were recorded during lithiation of the WE (45 wt% LCO, 50 wt% LPS and 5 wt% VGCF) cycled vs.  $\text{InLi}_x$ .

**Note 1: Physical model for the observed binding energy shift**

Figure S7 illustrates the energy diagram of the sample and the hemispherical analyzer in a XPS measurement.<sup>1, 2</sup> which states the correlation between surface potential and the binding energy shift.

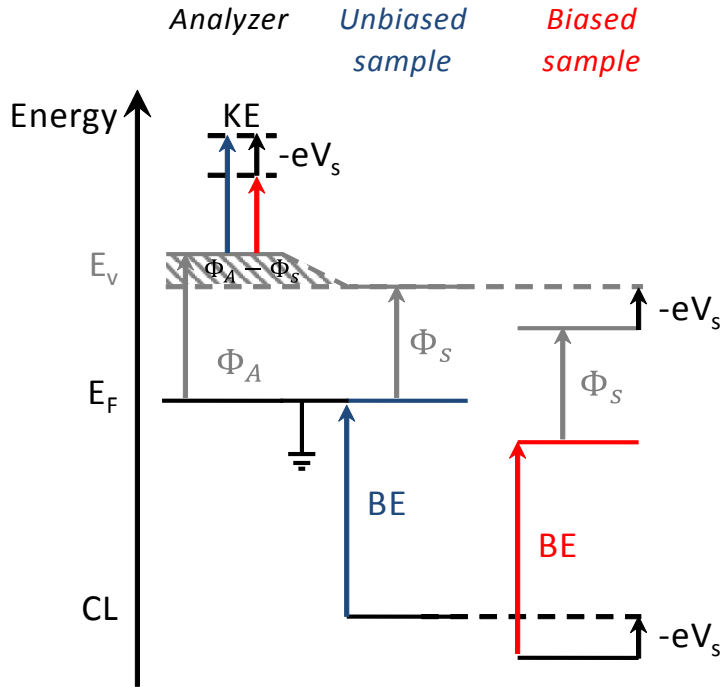

**Figure S4.** Energy diagram of the XPS measurement for an unbiased and biased sample.  $E_V$ : vacuum level,  $E_F$ : Fermi level, CL: core level,  $\Phi$ : work function, A: hemispherical energy analyzer, s: sample, BE: binding energy and  $V_s$ : surface potential.

For an unbiased (grounded) sample, as depicted in Figure S7, the kinetic energy of the photo-electrons measured by the analyzer depends on the binding energy (BE) as well as the analyzer work function.<sup>1</sup>

$$KE_A (unbiased) = h\nu - BE - \Phi_s - (\Phi_A - \Phi_s) \quad \text{Equation S1}$$

If the Fermi levels of the analyzer ( $E_F^A$ ) and the sample  $E_F^S$  are aligned, as in the case of a grounded sample, the measured kinetic energy is independent of the sample work function ( $\Phi_s$ ).

The hemispherical energy analyzer measures the kinetic energy (KE) of the emitted photoelectrons from the sample. By calibrating the analyzer work function, it is possible to accurately calculate the BE according to Equation S2, especially if monochromatized source radiation is used.

$$KE_A = h\nu - BE - \Phi_A \quad \text{Equation S2}$$

In case of external bias voltage on the electrochemical cell, the applied voltage has a direct influence on the position of  $E_F^S$ . The measured kinetic energy ( $KE_A$ ) is then dependent on the relative positions between  $E_F^A$  and  $E_F^S$ . Noting  $\Delta E_F = -e\Delta V_s$ , the KE energy for a biased sample can be expressed in the following way:

$$KE_A (biased) = h\nu - BE - eV_s - \Phi_A \quad \text{Equation S3}$$

Therefore

$$KE_A (biased) - KE_A (unbiased) = \Delta KE = -e\Delta V_s \quad \text{Equation S4}$$

Taken the fundamental measurement principle of the analyzer into account (Equation S2), which only concludes the BE from  $KE_A$ , the measured BE ( $BE_A$ ) will also shift according to the biased surface potential.

$$BE_A (biased) - BE_A (unbiased) = \Delta BE = e\Delta V_s \quad \text{Equation S5}$$

If the counter electrode in the operando XPS cell is grounded to the analyzer, the relationship in Equation S5 can be directly used to describe the correlation between the observed shift in BE and the surface potential on the particles constituting the WE.

If the WE is grounded to the analyzer, the electronically conductive elements of the WE will exhibit no BE shift due to charge compensation. However, insulating components, such as the SE, will have an apparent BE shift, due to the relative change of their  $E_F$  position to the analyzer.

The influence of the cell voltage ( $V_{cell}$ ) on the  $E_F$  of the electrodes is described as follows:

$$V_{cell} = E_{WE} - E_{CE} = -\frac{E_F^{WE} - E_F^{CE}}{e} \quad \text{Equation S6}$$

With  $E_F^{WE} = E_F^A$  and  $E_F^{CE} - E_F^{SE} = \text{const.}$  (in the case of  $\text{InLi}_x$  the (de)lithiation process occurs on a electrochemical potential plateau), the relative difference between  $E_F^{SE}$  and  $E_F^A$  is

$$\Delta(E_F^{SE} - E_F^A) = e\Delta V_{cell} \quad \text{Equation S7}$$

The change in cell voltage causes a proportional  $E_F$  shift of the sample with respect to the analyzer.

Equation S4 is thus further modified as follows:

$$\Delta KE = -e\Delta V_s + e\Delta V_{cell} \quad \text{Equation S8}$$

Applying the relationship in Equation S2 analogously as above, the change in binding energy for all insulating and semi-conducting components of the WE is

$$\Delta BE = e(\Delta V_s - \Delta V_{cell}) \quad \text{Equation S9}$$

**Operando XPS measurement on the carbon-free WE LCO/LPS (50/50, w/w)**

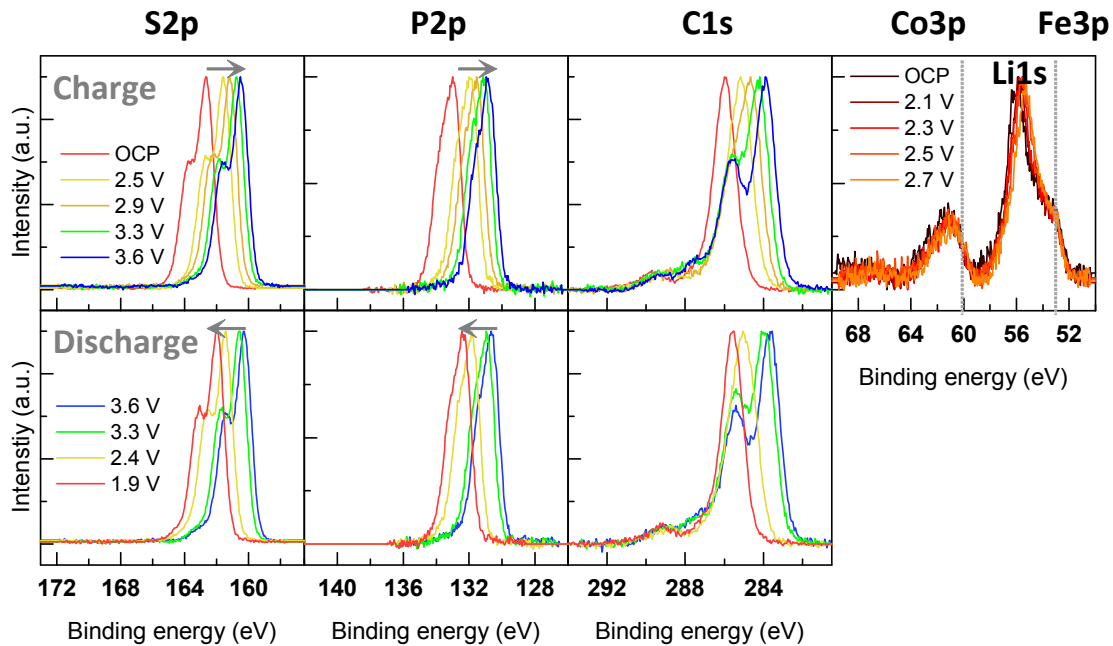

**Figure S5.** XPS core levels spectra at each potential recorded during the operando XPS measurement of the LCO/LPS (50/50) WE. The arrows indicate the direction of the peak shifts. The WE was grounded to the analyzer during the measurement.

**References**

1. C. S. Fadley, *Academic, New York*, 1978.
2. M. A. Brown, Z. Abbas, A. Kleibert, R. G. Green, A. Goel, S. May and T. M. Squires, *Phys. Rev. X*, 2016, **6**, 011007.
